# Supplementary material for: Additive Manufacturing of Poly(3-hydroxybutyrate-co-3-hydroxyvalerate)/Poly(D,L-lactide-co-glycolide) Biphasic Scaffolds for Bone Tissue Regeneration
Source: MDPI journal article supplement (doi:10.3390/ijms23073895), 2022-03-31
Supplement: s1 [file s1]

## Supplementary materials

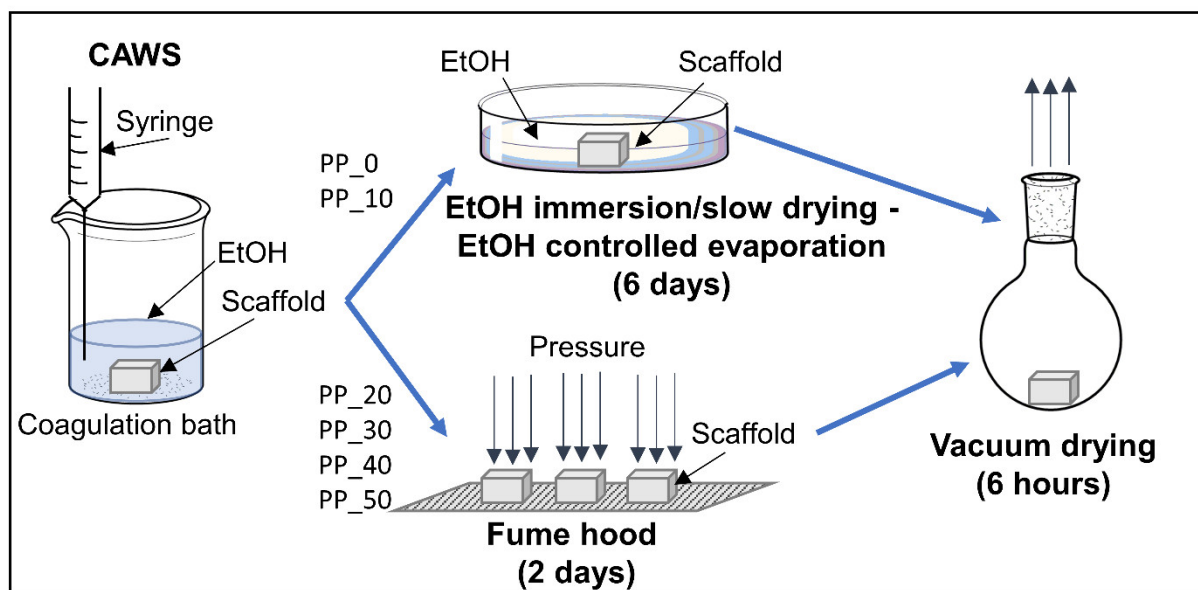

Figure S1 Schematic representation of the post-processing steps carried out on the fabricated scaffolds
